# Supplementary material for: Adherens Junction Integrity Is a Critical Determinant of Sodium Iodide Symporter Residency at the Plasma Membrane of Thyroid Cells
Source: MDPI journal article supplement (doi:10.3390/cancers14215362), 2022-10-31

# **Adherens Junction integrity is a critical determinant of sodium iodide symporter residency at the plasma membrane of thyroid cells**

Márcia Faria <sup>1,2,3</sup>, José Vareda <sup>1,4</sup>, Micaella Miranda<sup>1,4</sup>, Maria João Bugalho <sup>1,5</sup>, Ana Luísa Silva <sup>1,4,5,†,\*</sup>, Paulo Matos <sup>2,3,†</sup>,

,

1 Serviço de Endocrinologia, Diabetes e Metabolismo do CHULN-Hospital Santa Maria,  
1649-028 Lisboa, Portugal

2 BioISI-Biosystems and Integrative Sciences Institute, Faculdade de Ciências da  
Universidade de Lisboa, 1749-016 Lisboa, Portugal

3 Departamento de Genética Humana, Instituto Nacional de Saúde Doutor Ricardo Jorge,  
1649-016 Lisboa, Portugal

4 ISAMB-Instituto de Saúde Ambiental, Faculdade de Medicina da Universidade de  
Lisboa,  
1649-028 Lisboa, Portugal

5 Faculdade de Medicina da Universidade de Lisboa, 1649-028 Lisboa, Portugal

\* Correspondence: [silva.r.analuisa@gmail.com](mailto:silva.r.analuisa@gmail.com)

† Co-senior authors.

|                                                               |
|---------------------------------------------------------------|
| <b>Original WB films used to assemble the various Figures</b> |
|---------------------------------------------------------------|

Figure 1C

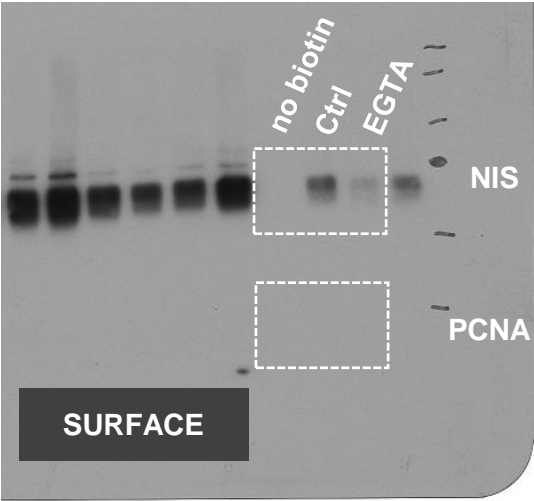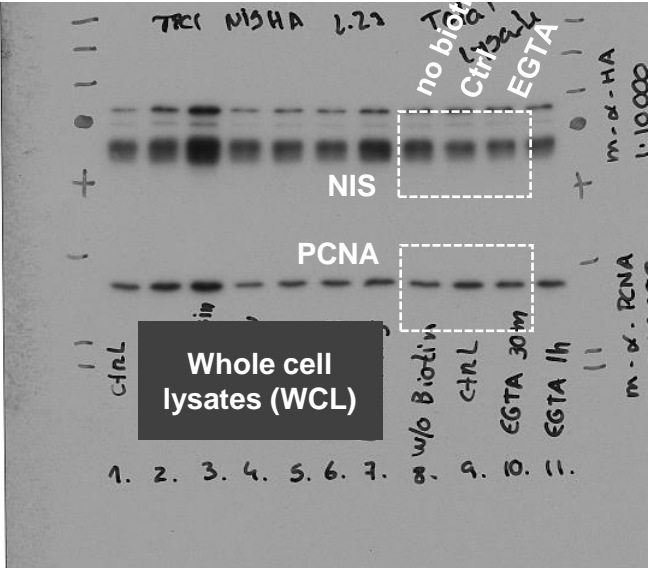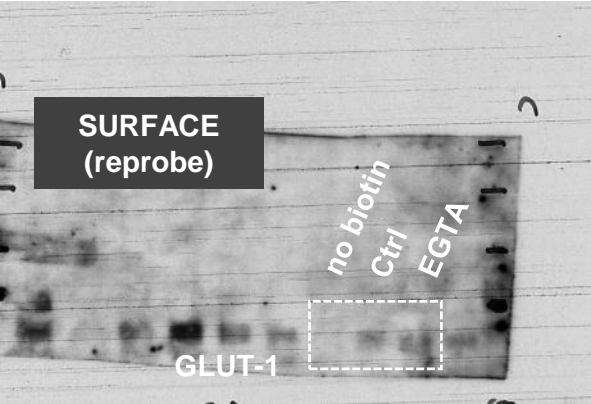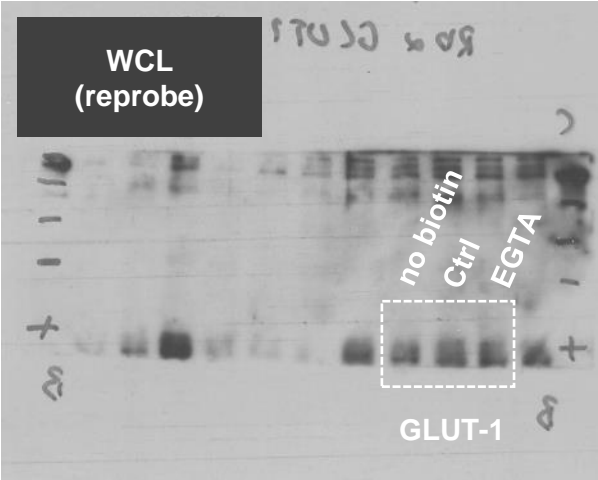

Figure 2A

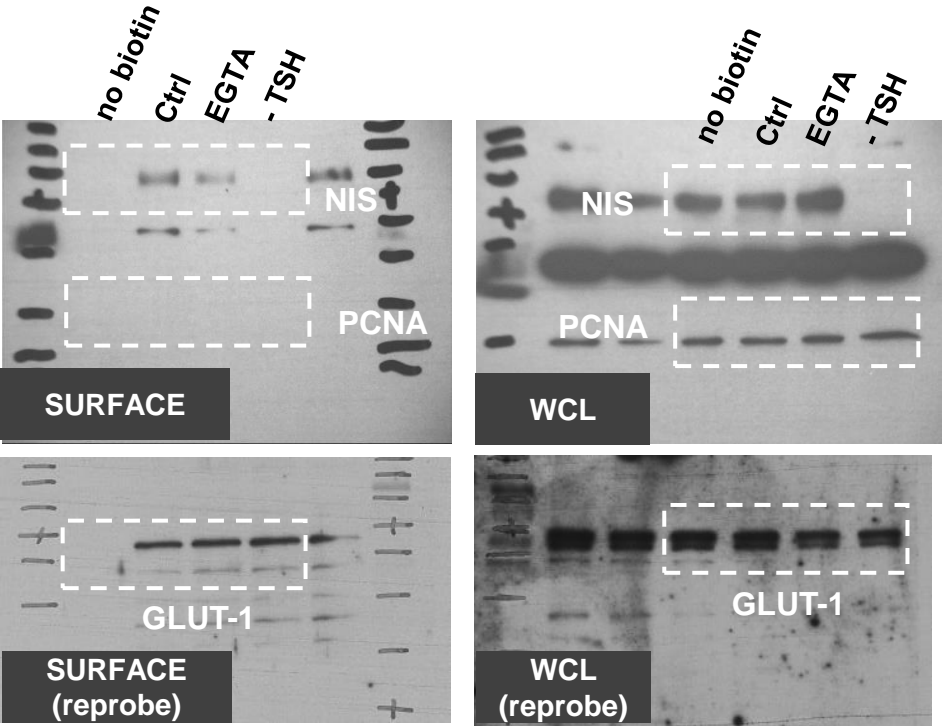

# Figure 3D

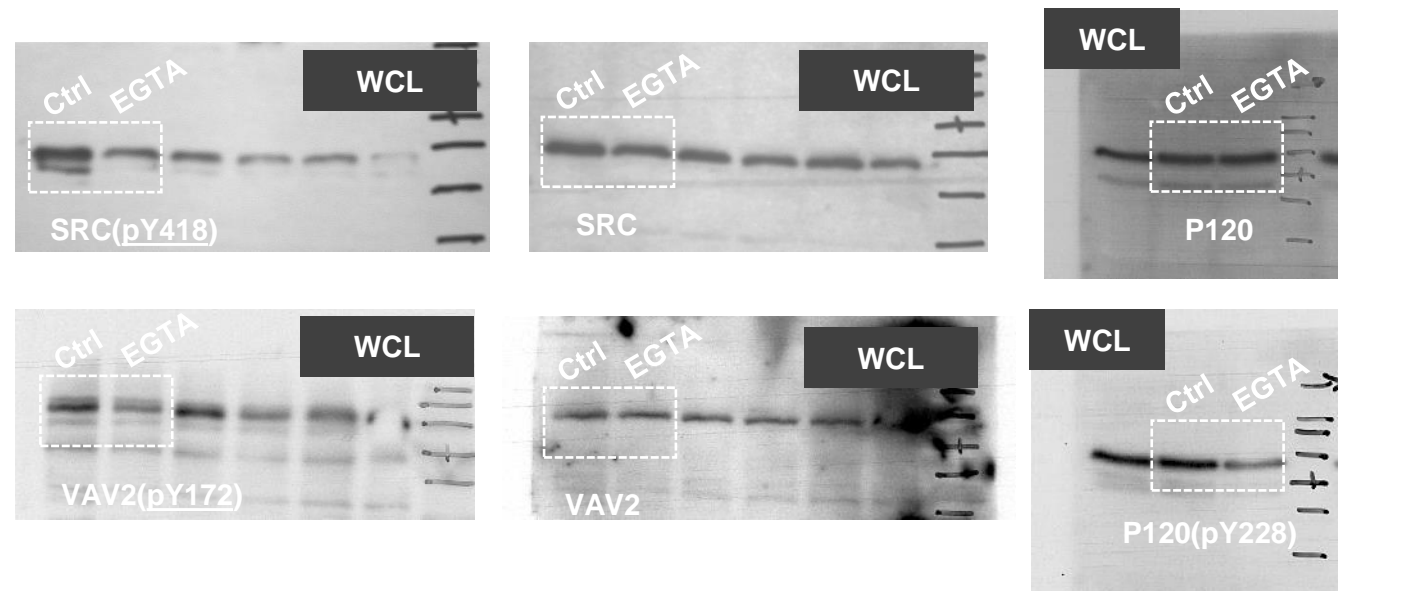

**Figure 1: VAV2 and SRC are enriched in the plasma membrane fraction and are associated with GTP-RAC1.**

The figure displays five Western blot panels. The top left panel shows GTP-RAC1 and Total RAC1 in PD and WCL fractions. The top right panel shows Total RAC1 in PD and WCL fractions. The bottom left panel shows VAV2 (pY172) and SRC (pY418) in WCL fractions. The bottom middle panel shows VAV2 and SRC in WCL fractions. The bottom right panel shows VAV2 (pY172) and SRC (pY418) in WCL fractions. All panels show bands for Ctrl and EGTA treatments.

Figure 1: Western blot analysis of RAC1 and PCNA. The figure consists of three panels. The top panel shows NIS and PCNA blots for SURFACE and WCL fractions. The middle panel shows a RAC1 blot for the WCL fraction. The bottom panel shows a reprobe of the SURFACE and WCL fractions. All panels show lanes for Ctrl, RAC1, EGTA, RAC1 + EGTA, and No Biotin. Molecular weight markers are indicated on the left of each blot.

Figure 5A

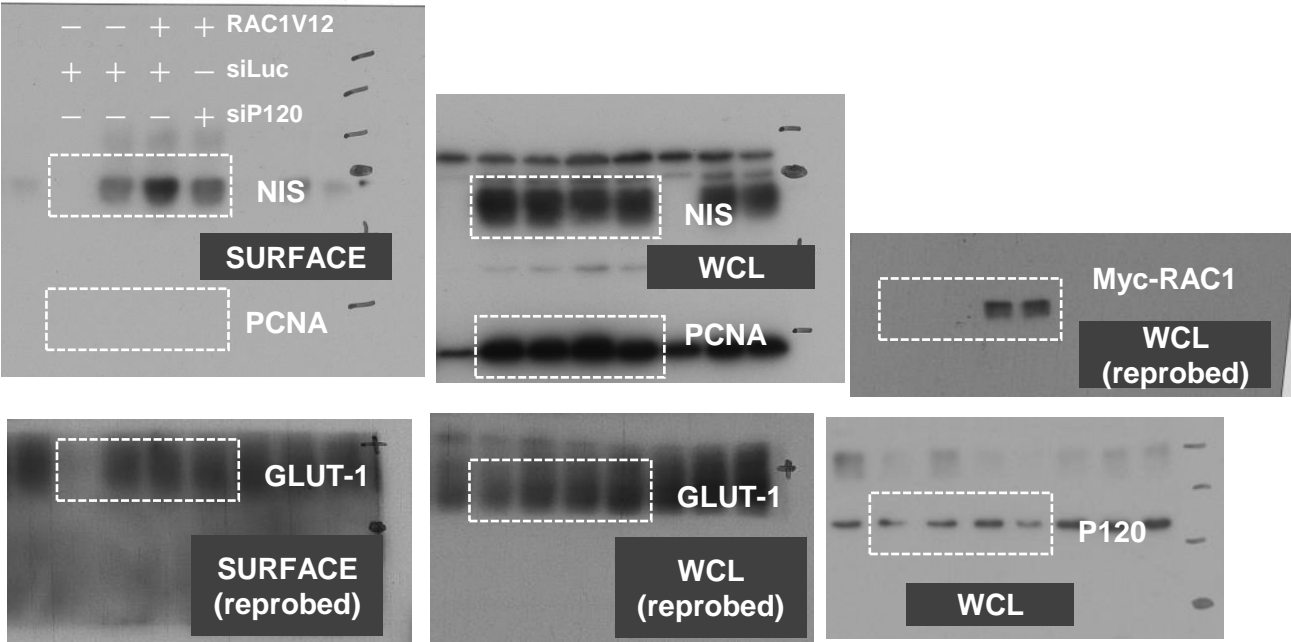

Figure 5B

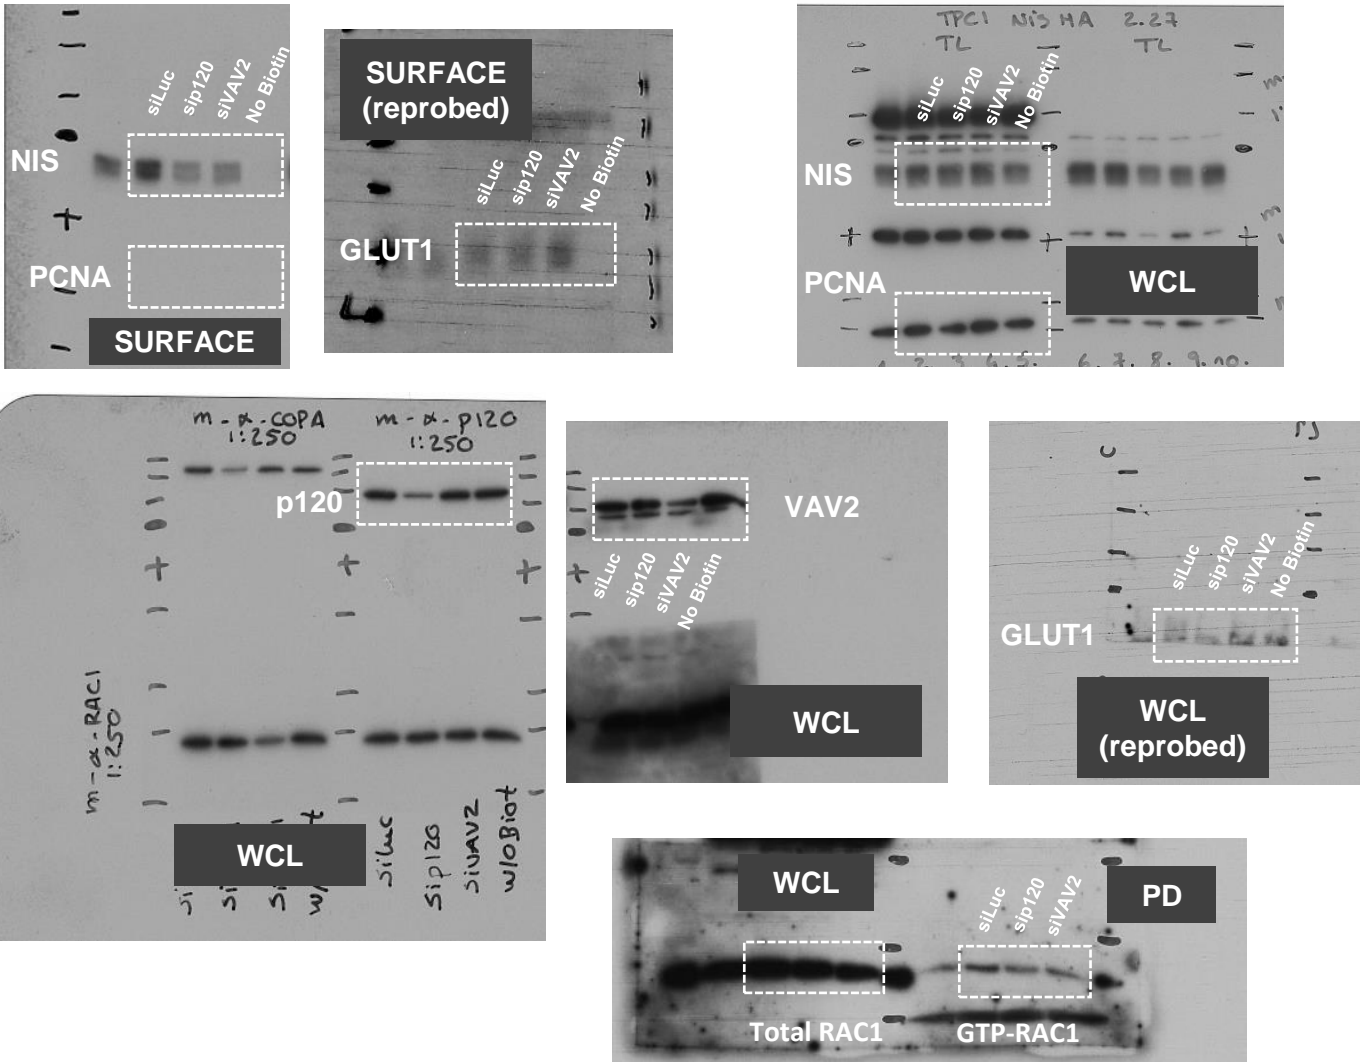

Supplement: s1 [file s1]
